# Supplementary material for: In Situ Construction of Nitrogen-Doped and Zinc-Confined Microporous Carbon Enabling Efficient Na+-Storage Abilities
Source: MDPI journal article supplement (doi:10.3390/ijms24108777), 2023-05-15
Supplement: s1 [file s1]

## Supplementary Information

Article

# In Situ Construction of Nitrogen-Doped and Zinc-Confined Microporous Carbon Enabling Efficient Na<sup>+</sup>-Storage Abilities

Wan-Ling Liao <sup>1</sup>, Mohamed M. Abdelaal <sup>1,2</sup>, Rene Mary Amirtha <sup>1</sup>, Chia-Chen Fang <sup>3</sup>, Chun-Chen Yang <sup>1,4,5</sup> and Tai-Feng Hung <sup>1,\*</sup>

<sup>1</sup> Battery Research Center of Green Energy, Ming Chi University of Technology, 84 Gungjuan Rd., New Taipei City 24301, Taiwan

<sup>2</sup> Tabbín Institute for Metallurgical Studies (TIMS), Tabbín, Helwan 109, Cairo 11421, Egypt

<sup>3</sup> Material and Chemical Research Laboratories, Industrial Technology Research Institute, 195, Sec. 4, Chung Hsing Rd., Hsinchu 31040, Taiwan

<sup>4</sup> Department of Chemical Engineering, Ming Chi University of Technology, 84 Gungjuan Rd., New Taipei City 24301, Taiwan

<sup>5</sup> Department of Chemical and Materials Engineering, Chang Gung University, 259 Wenhua 1st Rd., Taoyuan 33302, Taiwan

\* Correspondence: taifeng@mail.mcut.edu.tw; Tel.: +886-2-2908-9899 (ext. 4957)

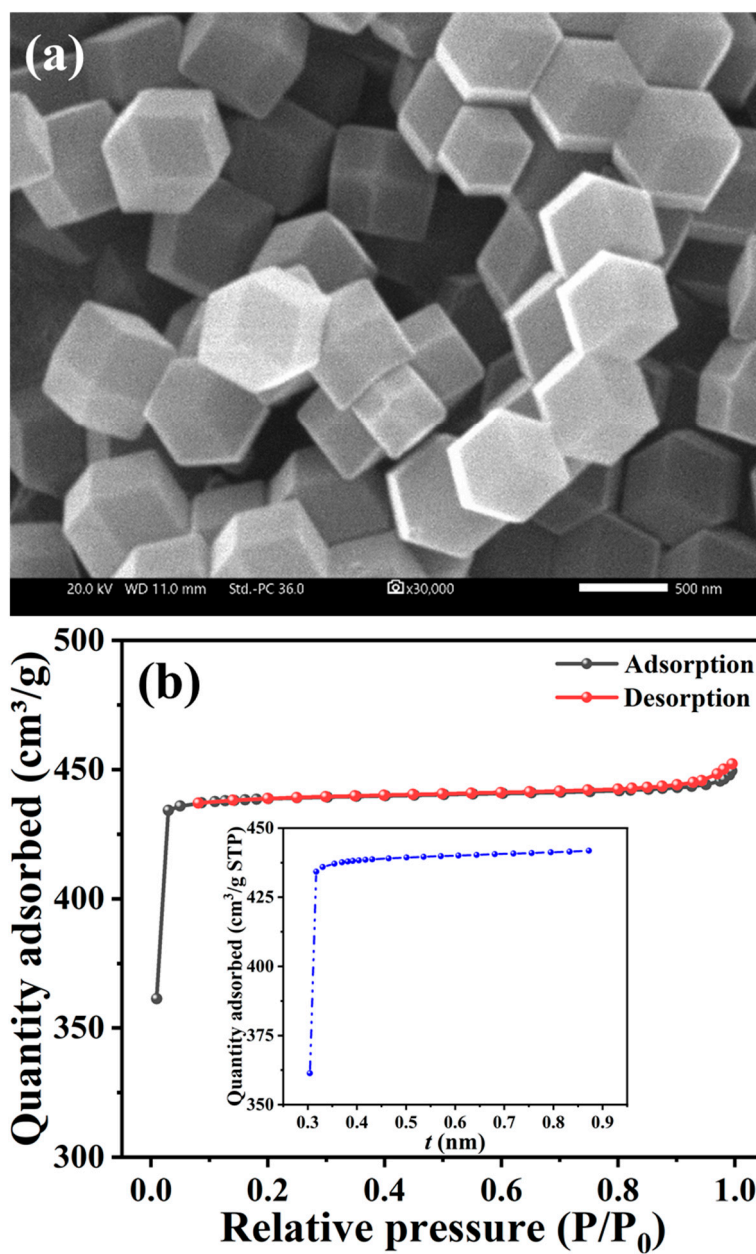

**Figure S1.** (a) SEM micrograph and (b) nitrogen adsorption-desorption isotherm of ZIF-8. Scale bar of (a) is 500 nm, whereas the inset of (b) shows the pore-size distribution analyzed by a *t*-plot method.

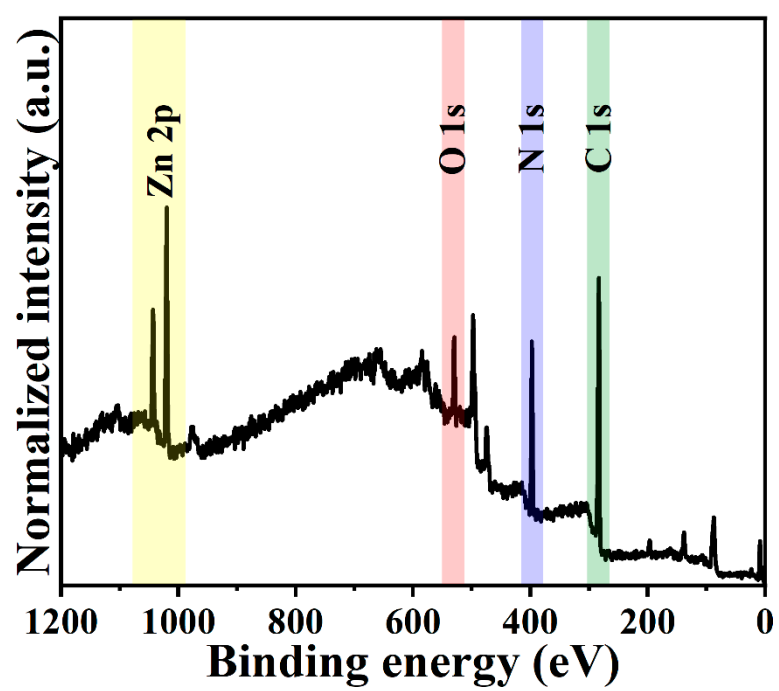

**Figure S2.** Full-range XPS spectrum of ZIF-8.

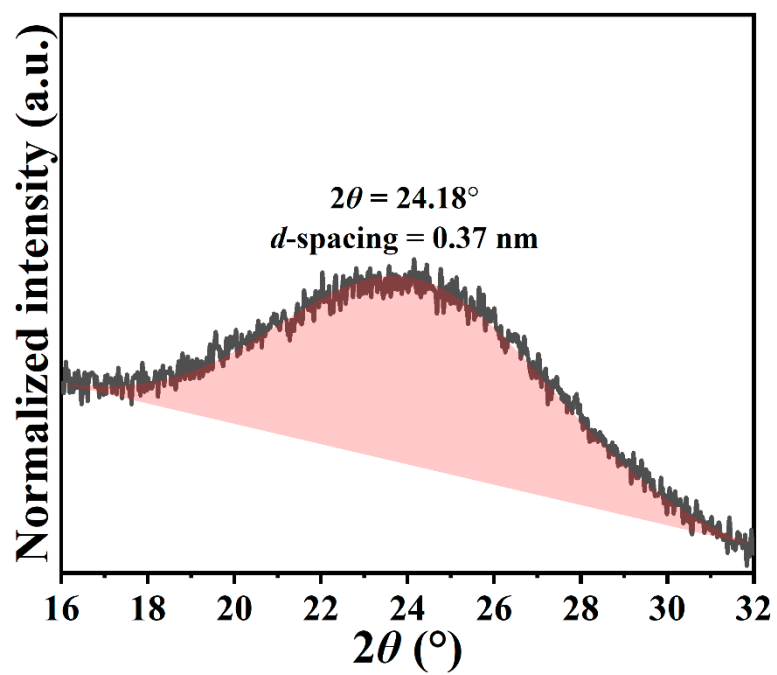

**Figure S3.** The magnified XRD pattern of (002) peak for *N,Z*-MPC analyzing by Gaussian-Lorentzian method.

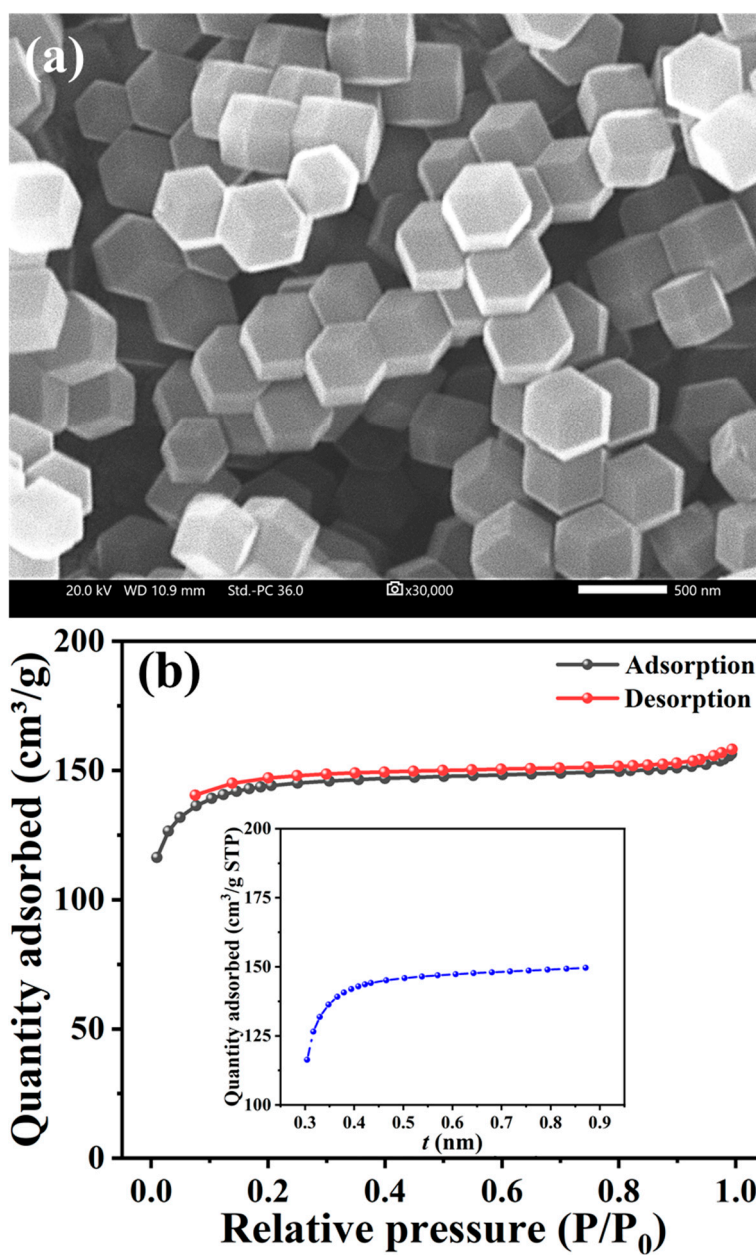

**Figure S4.** (a) SEM micrograph and (b) nitrogen adsorption-desorption isotherm of *N,Z*-MPC. Scale bar of (a) is 500 nm, whereas the inset of (b) shows the pore-size distribution analyzed by a *t*-plot method.

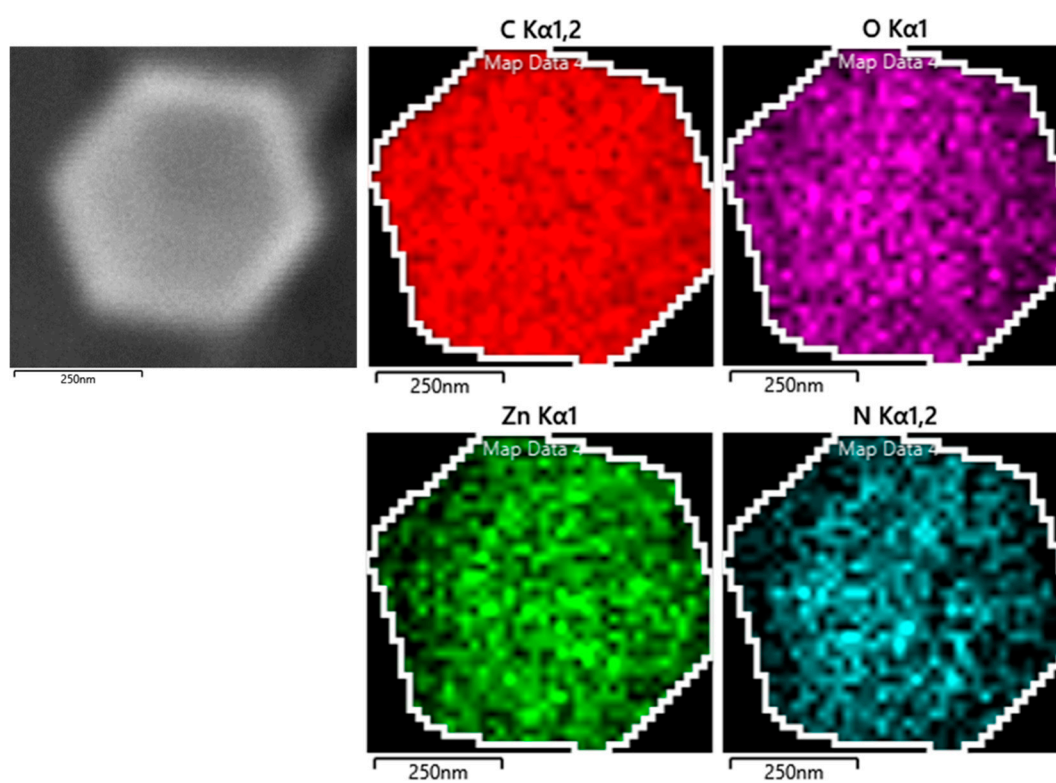

**Figure S5.** SEM-EDX analysis of *N,Z*-MPC, scale bar: 250 nm.

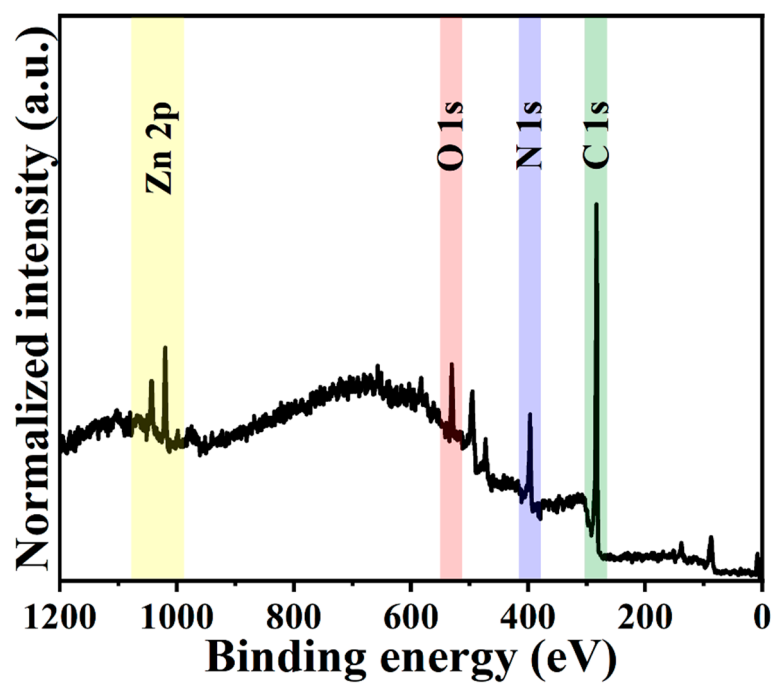

**Figure S6.** Full-range XPS spectrum of *N,Z*-MPC.

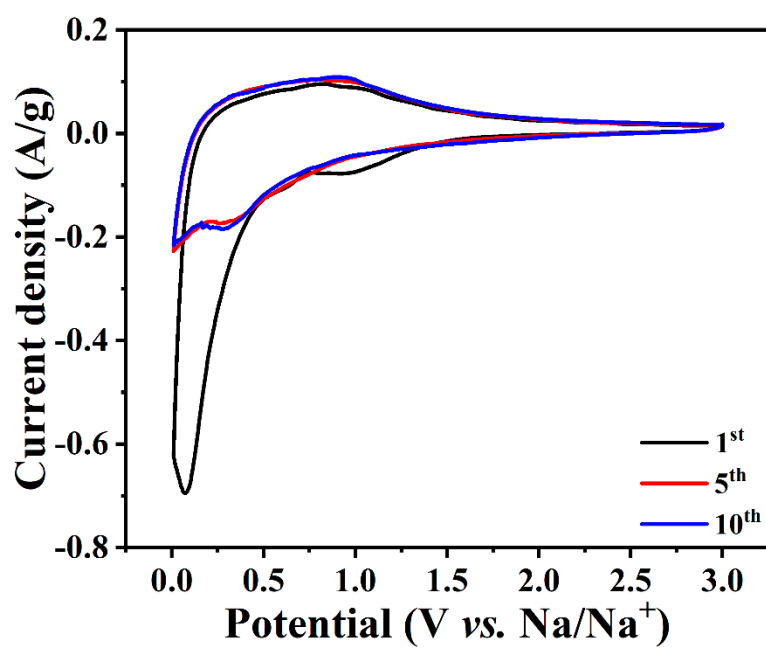

**Figure S7.** Cyclic voltammograms of *N,Z*-MPC collected in the potential range between 0.01 V and 3.0 V (vs. Na/Na<sup>+</sup>) at a scanning rate of 0.2 mV/sec.



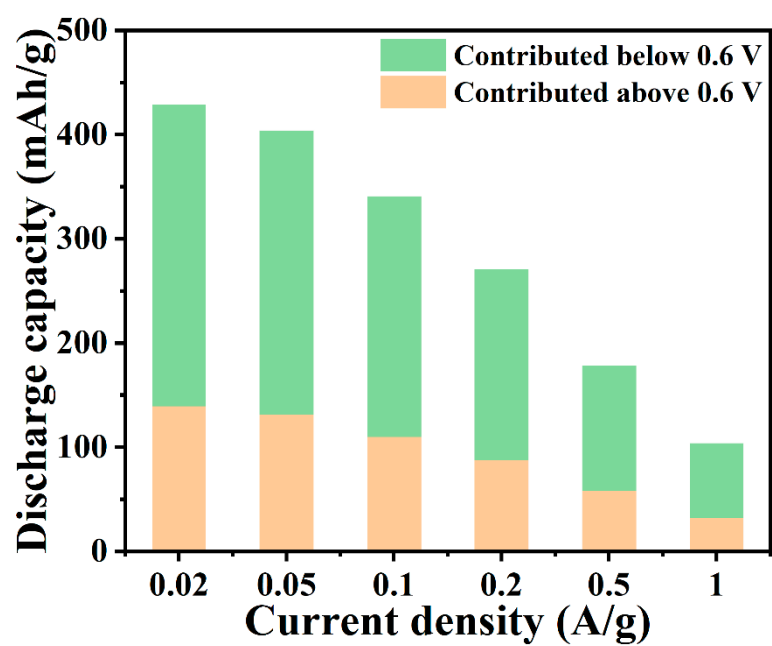

**Figure S8.** Relationship between the discharge capacity contributed from the potential below and above 0.6 V (vs. Na/Na<sup>+</sup>) and current density.

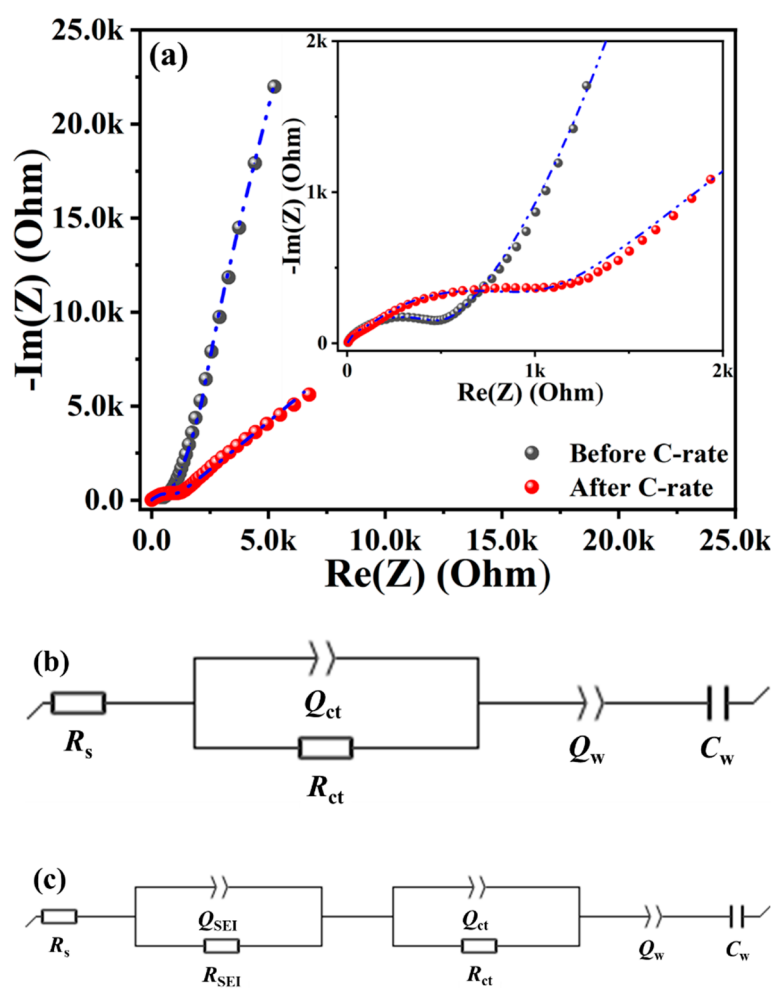

**Figure S9.** (a) Electrochemical impedance spectra of *N,Z*-MPC, and the equivalent circuit models used for parameter fitting: (b) before and (c) after C-rate measurements.

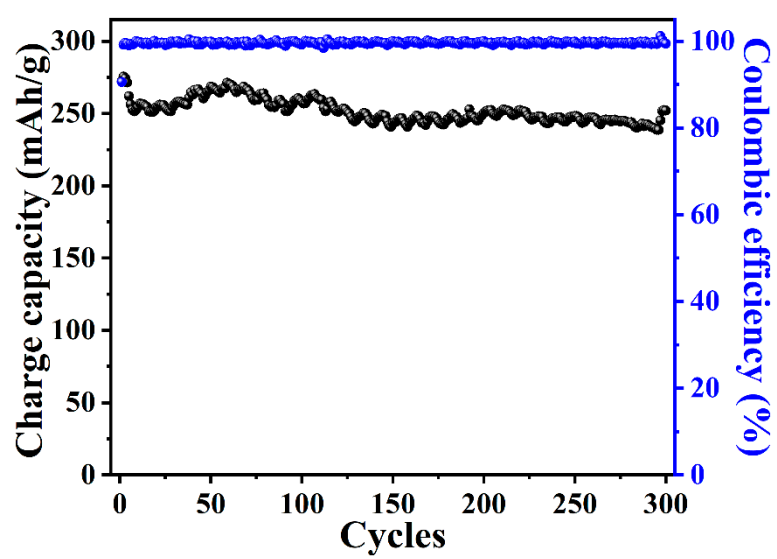

**Figure S10.** The cycling stability of *N,Z*-MPC measured at 0.2 A/g.

**Table S1.** Parameters of (002) peak from XRD pattern and related profile-fitting results.

| (002) peak      |               |                          | Graphitic region |                          |          | Disordered region |                          |          | $R^{\ddagger}$ |
|-----------------|---------------|--------------------------|------------------|--------------------------|----------|-------------------|--------------------------|----------|----------------|
| Sample          | $2\theta$ (°) | $d_{002}^{\dagger}$ (nm) | $2\theta$ (°)    | $d_{002}^{\dagger}$ (nm) | Area (%) | $2\theta$ (°)     | $d_{002}^{\dagger}$ (nm) | Area (%) |                |
| <i>N,Z</i> -MPC | 24.18         | 0.37                     | 26.37            | 0.34                     | 33       | 23.05             | 0.39                     | 67       | 2.96           |

$^{\dagger}$ Calculated by Bragg equation with the center of (002) diffraction peak.

$^{\ddagger}$ Defined as the ratio of the height of the (002) diffraction peak to the background.

**Table S2.** Comparisons of the electrochemical performances on previously reported nitrogen-doped carbon anodes for sodium-ion batteries using the carbonate-based electrolyte.

| N content <sup>†</sup><br>(%) | S <sub>BET</sub><br>(m <sup>2</sup> /g) | Initial Coulombic efficiency<br>(%) | Specific capacity<br>(mAh/g at A/g)     | Capacity retention<br>(%)                                    | Ref.       |
|-------------------------------|-----------------------------------------|-------------------------------------|-----------------------------------------|--------------------------------------------------------------|------------|
| 6.5                           | 8                                       | 57                                  | 435 at 0.05, 147 at 2.0                 | 74 at 1,200 cycles at 1 A/g                                  | [20]       |
| 19.5                          | 476                                     | 25                                  | 335 at 0.05, 94 at 5.0                  | 95 at 265 cycles at 0.05 A/g                                 | [55]       |
| 8.6                           | 751                                     | 22                                  | 310 at 0.05, 54 at 5.0                  | 90 at 2,000 cycles at 1 A/g <sup>‡</sup>                     | [56]       |
| N/A                           | 3                                       | N/A                                 | 210 at 0.05, 135 at 5.0                 | 71 at 600 cycles at 0.2 A/g                                  | [57]       |
| 9                             | 265                                     | 66                                  | 270 at 0.05, 185 at 1.0                 | 88 at 300 cycles at 1 A/g                                    | [58]       |
| 4.6                           | 6                                       | N/A                                 | 373 at 0.025, 120 at 1.0                | 95 at 1,000 cycles at 0.2 A/g                                | [62]       |
| 19.3                          | 82                                      | N/A                                 | 264 at 0.1, 57 at 40                    | 99 at 2,000 cycles at 0.5 A/g                                | [43]       |
| 3.9                           | 202                                     | 56                                  | 332 at 0.1, 135 at 1.6                  | 87 at 300 cycles at 0.2 A/g                                  | [63]       |
| 5.8                           | 111                                     | 76                                  | 285 at 0.05, 153 at 5.0                 | 94 at 600 cycles at 1 A/g                                    | [59]       |
| 10.5                          | 212                                     | N/A                                 | 263 at 0.05, 92 at 10.0                 | 84 at 2,000 cycles at 0.5 A/g <sup>¶</sup>                   | [60]       |
| 16.1                          | 441                                     | 38                                  | 423 at 0.02, 392 at 0.05,<br>104 at 1.0 | 93 at 300 cycles at 0.2 A/g<br>97 at 3,000 cycles at 1.0 A/g | This study |

<sup>†</sup>Determined by XPS, <sup>‡</sup>Calculated based on 100<sup>th</sup> cycle, <sup>¶</sup>Calculated based on 10<sup>th</sup> cycle.

## References:

20. Feng, X.; Bai, Y.; Zheng, L.; Liu, M.; Li, Y.; Zhao, R.; Li, Y.; Wu, C. Effect of different nitrogen configurations on sodium storage properties of carbon anodes for sodium ion batteries. *ACS Appl. Mater. Interfaces* 2021, *13*, 56285-56295.
43. Liu, J.; Zhang, Y.; Zhang, L.; Xie, F.; Vasileff, A.; Qiao, S.-Z. Graphitic carbon nitride (g-C<sub>3</sub>N<sub>4</sub>)-derived N-rich graphene with tuneable interlayer distance as a high-rate anode for sodium-ion batteries. *Adv. Mater.* 2019, *31*, 1901261.
55. Zhong, X.; Li, Y.; Zhang, L.; Tang, J.; Li, X.; Liu, C.; Shao, M.; Lu, Z.; Pan, H.; Xu, B. High-performance sodium-ion batteries based on nitrogen-doped mesoporous carbon spheres with ultrathin nanosheets. *ACS Appl. Mater. Interfaces* 2019, *11*, 2970-2977.
56. Qu, Y.; Guo, M.; Wang, X.; Yuan, C. Novel nitrogen-doped ordered mesoporous carbon as high-performance anode material for sodium-ion batteries. *J. Alloys Compd.* 2019, *791*, 874-882.
57. Xue, K.; Si, Y.; Xie, S.; Yang, J.; Mo, Y.; Long, B.; Wei, W.; Cao, P.; Wei, H.; Guan, H.; et al. Free-standing N-doped porous carbon fiber membrane derived from Zn-MOF-74: Synthesis and application as anode for sodium-ion battery with an excellent performance. *Front. Chem.* 2021, *9*.
58. Yanilmaz, M.; Atıcı, B.; Zhu, J.; Toprakci, O.; Kim, J. N-doped carbon nanoparticles on highly porous carbon nanofiber electrodes for sodium ion batteries. *RSC Adv.* 2023, *13*, 7834-7842.
59. Shan, C.; Feng, X.; Yang, J.; Yang, X.; Guan, H.-Y.; Argueta, M.; Wu, X.-L.; Liu, D.-S.; Austin, D.J.; Nie, P.; et al. Hierarchical porous carbon pellicles: Electrospinning synthesis and applications as anodes for sodium-ion batteries with an outstanding performance. *Carbon* 2020, *157*, 308-315.
60. Zhang, J.; Zhang, Q.; Qu, X.; Xu, G.; Fan, B.; Yan, Z.; Gui, F.; Yang, L. Hierarchically pyridinic-nitrogen enriched porous carbon for advanced sodium-ion and lithium-sulfur batteries: Electrochemical performance and in situ Raman spectroscopy investigations. *Appl. Surf. Sci.* 2022, *574*, 151559.
62. Nie, W.; Cheng, H.; Liu, X.; Sun, Q.; Tian, F.; Yao, W.; Liang, S.; Lu, X.; Zhou, J. Surface organic nitrogen-doping disordered biomass carbon materials with superior cycle stability in the sodium-ion batteries. *J. Power Sources* 2022, *522*, 230994.
63. Chen, Y.; Wu, Y.; Liao, Y.; Zhang, Z.; Luo, S.; Li, L.; Wu, Y.; Qing, Y. Tuning carbonized wood fiber via sacrificial template-assisted hydrothermal synthesis for high-performance lithium/sodium-ion batteries. *J. Power Sources* 2022, *546*, 231993.
